# Supplementary material for: Impact of sex on humoral immunity with live influenza B virus vaccines in mice
Source: PubMed Central journal article supplement (PMC10897209; doi:10.1038/s41541-024-00827-x), 2024-02-26
Supplement: 41541_2024_827_MOESM2_ESM.pdf [file 41541_2024_827_MOESM2_ESM.pdf]

## Reporting Summary

Nature Portfolio wishes to improve the reproducibility of the work that we publish. This form provides structure for consistency and transparency in reporting. For further information on Nature Portfolio policies, see our [Editorial Policies](#) and the [Editorial Policy Checklist](#).

### Statistics

For all statistical analyses, confirm that the following items are present in the figure legend, table legend, main text, or Methods section.

- | n/a                                 | Confirmed                                                                                                                                                                                                                                                                                      |
|-------------------------------------|------------------------------------------------------------------------------------------------------------------------------------------------------------------------------------------------------------------------------------------------------------------------------------------------|
| <input type="checkbox"/>            | <input checked="" type="checkbox"/> The exact sample size ( $n$ ) for each experimental group/condition, given as a discrete number and unit of measurement                                                                                                                                    |
| <input type="checkbox"/>            | <input checked="" type="checkbox"/> A statement on whether measurements were taken from distinct samples or whether the same sample was measured repeatedly                                                                                                                                    |
| <input type="checkbox"/>            | <input checked="" type="checkbox"/> The statistical test(s) used AND whether they are one- or two-sided<br><i>Only common tests should be described solely by name; describe more complex techniques in the Methods section.</i>                                                               |
| <input checked="" type="checkbox"/> | <input type="checkbox"/> A description of all covariates tested                                                                                                                                                                                                                                |
| <input checked="" type="checkbox"/> | <input type="checkbox"/> A description of any assumptions or corrections, such as tests of normality and adjustment for multiple comparisons                                                                                                                                                   |
| <input type="checkbox"/>            | <input checked="" type="checkbox"/> A full description of the statistical parameters including central tendency (e.g. means) or other basic estimates (e.g. regression coefficient) AND variation (e.g. standard deviation) or associated estimates of uncertainty (e.g. confidence intervals) |
| <input checked="" type="checkbox"/> | <input type="checkbox"/> For null hypothesis testing, the test statistic (e.g. $F$ , $t$ , $r$ ) with confidence intervals, effect sizes, degrees of freedom and $P$ value noted<br><i>Give <math>P</math> values as exact values whenever suitable.</i>                                       |
| <input checked="" type="checkbox"/> | <input type="checkbox"/> For Bayesian analysis, information on the choice of priors and Markov chain Monte Carlo settings                                                                                                                                                                      |
| <input checked="" type="checkbox"/> | <input type="checkbox"/> For hierarchical and complex designs, identification of the appropriate level for tests and full reporting of outcomes                                                                                                                                                |
| <input checked="" type="checkbox"/> | <input type="checkbox"/> Estimates of effect sizes (e.g. Cohen's $d$ , Pearson's $r$ ), indicating how they were calculated                                                                                                                                                                    |

*Our web collection on [statistics for biologists](#) contains articles on many of the points above.*

### Software and code

Policy information about [availability of computer code](#)

Data collection

Data analysis

For manuscripts utilizing custom algorithms or software that are central to the research but not yet described in published literature, software must be made available to editors and reviewers. We strongly encourage code deposition in a community repository (e.g. GitHub). See the Nature Portfolio [guidelines for submitting code & software](#) for further information.

### Data

Policy information about [availability of data](#)

All manuscripts must include a [data availability statement](#). This statement should provide the following information, where applicable:

- Accession codes, unique identifiers, or web links for publicly available datasets
- A description of any restrictions on data availability
- For clinical datasets or third party data, please ensure that the statement adheres to our [policy](#)

The protein microarray data discussed in this publication have been deposited in NCBI's Gene Expression Omnibus 48 and are accessible through GEO Series accession number GSE180642 and GSE205172.

## Research involving human participants, their data, or biological material

Policy information about studies with [human participants or human data](#). See also policy information about [sex, gender \(identity/presentation\), and sexual orientation](#) and [race, ethnicity and racism](#).

|                                                                    |                |
|--------------------------------------------------------------------|----------------|
| Reporting on sex and gender                                        | Not applicable |
| Reporting on race, ethnicity, or other socially relevant groupings | Not applicable |
| Population characteristics                                         | Not applicable |
| Recruitment                                                        | Not applicable |
| Ethics oversight                                                   | Not applicable |

Note that full information on the approval of the study protocol must also be provided in the manuscript.

## Field-specific reporting

Please select the one below that is the best fit for your research. If you are not sure, read the appropriate sections before making your selection.

Life sciences       Behavioural & social sciences       Ecological, evolutionary & environmental sciences

For a reference copy of the document with all sections, see [nature.com/documents/nr-reporting-summary-flat.pdf](https://www.nature.com/documents/nr-reporting-summary-flat.pdf)

## Life sciences study design

All studies must disclose on these points even when the disclosure is negative.

|                 |                                                                                                                                                                                                                                                                                                                                                                                                                                                                                                                            |
|-----------------|----------------------------------------------------------------------------------------------------------------------------------------------------------------------------------------------------------------------------------------------------------------------------------------------------------------------------------------------------------------------------------------------------------------------------------------------------------------------------------------------------------------------------|
| Sample size     | No sample size calculation was performed. Number of animals/group (n=12) meets and exceeds the standards for these types of studies in the field.                                                                                                                                                                                                                                                                                                                                                                          |
| Data exclusions | No data was excluded in the analyses.                                                                                                                                                                                                                                                                                                                                                                                                                                                                                      |
| Replication     | Virus growth kinetics were analyzed using the Gompertz growth non-linear regression model. Differences in growth rate between viruses were calculated by AUC analysis, followed by Brown-Forsythe and Welch ANOVA plus Dunnett's T3 post hoc analysis. Two-way ANOVA was employed to determine virus growth differences by timepoint. Statistically significant differences between viruses' growth rates are denoted. Western blot analyses were repeated at least twice starting from repeated infections/transfections. |
| Randomization   | Mice were randomly assigned to different group. Different analyses were performed based on vaccine backbone, presence/absence of IGIP, and impact of biological sex as extensively detailed in the manuscript.                                                                                                                                                                                                                                                                                                             |
| Blinding        | The study design, particularly during the animal study, required that personnel be fully aware of the groups in question to avoid errors in the allocation of data points during data collection. Personnel working and generating protein microarray data were blind to sample type and group allocation.                                                                                                                                                                                                                 |

## Reporting for specific materials, systems and methods

We require information from authors about some types of materials, experimental systems and methods used in many studies. Here, indicate whether each material, system or method listed is relevant to your study. If you are not sure if a list item applies to your research, read the appropriate section before selecting a response.

| Materials & experimental systems    |                                                                 | Methods                             |                                                 |
|-------------------------------------|-----------------------------------------------------------------|-------------------------------------|-------------------------------------------------|
| n/a                                 | Involved in the study                                           | n/a                                 | Involved in the study                           |
| <input type="checkbox"/>            | <input checked="" type="checkbox"/> Antibodies                  | <input checked="" type="checkbox"/> | <input type="checkbox"/> ChIP-seq               |
| <input type="checkbox"/>            | <input checked="" type="checkbox"/> Eukaryotic cell lines       | <input checked="" type="checkbox"/> | <input type="checkbox"/> Flow cytometry         |
| <input checked="" type="checkbox"/> | <input type="checkbox"/> Palaeontology and archaeology          | <input checked="" type="checkbox"/> | <input type="checkbox"/> MRI-based neuroimaging |
| <input type="checkbox"/>            | <input checked="" type="checkbox"/> Animals and other organisms |                                     |                                                 |
| <input checked="" type="checkbox"/> | <input type="checkbox"/> Clinical data                          |                                     |                                                 |
| <input checked="" type="checkbox"/> | <input type="checkbox"/> Dual use research of concern           |                                     |                                                 |
| <input checked="" type="checkbox"/> | <input type="checkbox"/> Plants                                 |                                     |                                                 |

## Antibodies

|                 |                                                                                                                                                                                                                                                                                                                                                                                                                                                                                                                                                                                                                                                                                                                                                                                                                                                                                                                                                                                                                                                                                                           |
|-----------------|-----------------------------------------------------------------------------------------------------------------------------------------------------------------------------------------------------------------------------------------------------------------------------------------------------------------------------------------------------------------------------------------------------------------------------------------------------------------------------------------------------------------------------------------------------------------------------------------------------------------------------------------------------------------------------------------------------------------------------------------------------------------------------------------------------------------------------------------------------------------------------------------------------------------------------------------------------------------------------------------------------------------------------------------------------------------------------------------------------------|
| Antibodies used | The following primary antibodies were used in this study: 1) Influenza B (B/Massachusetts/03/2010) Hemagglutinin / HA1 Antibody, Rabbit PAb, Antigen Affinity Purified, Sino Biological, catalog number #40191-T56. 2) Influenza B NP (B/Florida/4/2006) Polyclonal Antibody, Invitrogen, catalog number #PA5-81758, lot number XE3571622A. 3) IGIP Polyclonal Antibody, Invitrogen, catalog number #PA5-65316, lot number YD3882996. 4) GAPDH Monoclonal Antibody (6C5), Invitrogen, catalog number #AM4300, lot number 2673398. 5) Recombinant Anti-GFP antibody [EPR14104], abcam, catalog number #ab183734, lot number 1033451-2. 5) Polyclonal anti-influenza B raised in mice, developed in house. The following secondary antibodies were used: 1) Goat anti-Mouse IgG (H+L) Secondary Antibody, HRP, invitrogen, catalog number #31430, lot number YD375335. 2) Goat Anti-Rabbit IgG H&L (HRP), abcam, catalog number #ab6721, lot number GR3251481-1. The molecular marker was detected using Precision Protein™ StrepTactin-HRP Conjugate, BioRad, catalog number #1610380, lot number 64333457 |
| Validation      | Influenza B (B/Massachusetts/03/2010) Hemagglutinin / HA1 Antibody, Rabbit PAb, Antigen Affinity Purified, Sino Biological, catalog number #40191 has been validated for western blot (1:1000-1:5000) and ELISA (1:5000-1:10000). Influenza B NP (B/Florida/4/2006) Polyclonal Antibody, Invitrogen, catalog number #PA5-81758 has been validated for Western blot (1:1000-1:5000) and ELISA (1:5000-1:10000). IGIP Polyclonal Antibody, Invitrogen, catalog number #PA5-65316 has been validated for ICC/IFF (0.25ug/mL-2ug/mL). Validation for western blot was performed in house. Polyclonal anti-influenza B raised in mice, developed in house was validated for western blot in house. GAPDH Monoclonal Antibody (6C5), Invitrogen, catalog number #AM4300 has been validated for western blot (3ug/mL), IHC, ICC/IF (1ug/mL), IP and dot blot. Recombinant Anti-GFP antibody [EPR14104], abcam, catalog number #ab183734 has been validated for Flow cytometry, western blot, IHC-P and ICC/IF.                                                                                                   |

## Eukaryotic cell lines

Policy information about [cell lines and Sex and Gender in Research](#)

|                                                                   |                                                                                                                                                                                |
|-------------------------------------------------------------------|--------------------------------------------------------------------------------------------------------------------------------------------------------------------------------|
| Cell line source(s)                                               | Madin-Darby canine kidney (MDCK) and human embryonic kidney 293T cells (HEK293T) were a kind gift from Robert Webster, St Jude Children's Research Hospital, Memphis, TN, USA. |
| Authentication                                                    | Cell lines were not authenticated                                                                                                                                              |
| Mycoplasma contamination                                          | Mycoplasma testing is performed routinely in the lab using Fisher Scientific Universal Mycoplasma Detection Kit (catalog # 50189644FP)                                         |
| Commonly misidentified lines (See <a href="#">ICLAC</a> register) | Not applicable.                                                                                                                                                                |

## Animals and other research organisms

Policy information about [studies involving animals; ARRIVE guidelines](#) recommended for reporting animal research, and [Sex and Gender in Research](#)

|                         |                                                                                                                                                                                                                                                                                                                                                                                                                                                                                                                                                                                                                                                                                                                          |
|-------------------------|--------------------------------------------------------------------------------------------------------------------------------------------------------------------------------------------------------------------------------------------------------------------------------------------------------------------------------------------------------------------------------------------------------------------------------------------------------------------------------------------------------------------------------------------------------------------------------------------------------------------------------------------------------------------------------------------------------------------------|
| Laboratory animals      | Male and female DBA/2J mice (Strain #000671) were purchased from The Jackson Laboratory (Bar Harbor, ME) at 5 weeks old and raised until 7 weeks of age. DBA/2J mice are also known as DBA2, D2J, D2, DBA or DBA/2                                                                                                                                                                                                                                                                                                                                                                                                                                                                                                       |
| Wild animals            | Not applicable                                                                                                                                                                                                                                                                                                                                                                                                                                                                                                                                                                                                                                                                                                           |
| Reporting on sex        | Biological sex as a variable of immune responses is at the core of the manuscript. It was taken into account and reported throughout the manuscript.                                                                                                                                                                                                                                                                                                                                                                                                                                                                                                                                                                     |
| Field-collected samples | Not applicable                                                                                                                                                                                                                                                                                                                                                                                                                                                                                                                                                                                                                                                                                                           |
| Ethics oversight        | Animal studies were approved and conducted in compliance with all the regulations stated by the Institutional Animal Care and Use Committee (IACUC) of the University of Georgia (UGA; under AUP A2019 01-004-A2). Vaccination and challenge studies were conducted under ABSL-2 conditions at the Davison Life Sciences Complex, UGA. Animal studies and procedures were performed according to the Institutional Animal Care and Use Committee Guidebook of the Office of Laboratory Animal Welfare and PHS policy on Humane Care and Use of Laboratory Animals. Animal studies were carried out in compliance with the ARRIVE guidelines ( <a href="https://arriveguidelines.org">https://arriveguidelines.org</a> ). |

Note that full information on the approval of the study protocol must also be provided in the manuscript.

# Plants

---

Seed stocks

Not applicable

Novel plant genotypes

Not applicable

Authentication

Not applicable
